# Supplementary material
Source: publisher site journal article supplement (https://www.dovepress.com/article/508387)
Supplement: Supplementary file 1 [file get_supplementary_file.php]

**Supplementary Materials**

**Supplementary Table 1** 14 core journals based on Bradford's Law.

| Core Journals | Rank | Articles |
| --- | --- | --- |
| INTERNATIONAL JOURNAL OF BIOLOGICAL MACROMOLECULES | 1 | 45 |
| JOURNAL OF GINSENG RESEARCH | 2 | 41 |
| CARBOHYDRATE POLYMERS | 3 | 31 |
| JOURNAL OF ETHNOPHARMACOLOGY | 4 | 28 |
| MOLECULES | 5 | 18 |
| ACTA PHYSIOLOGIAE PLANTARUM | 6 | 11 |
| JOURNAL OF FUNCTIONAL FOODS | 7 | 11 |
| JOURNAL OF MICROBIOLOGY AND BIOTECHNOLOGY | 8 | 11 |
| PHYTOMEDICINE | 9 | 11 |
| AMERICAN JOURNAL OF CHINESE MEDICINE | 10 | 10 |
| FOOD & FUNCTION | 11 | 10 |
| JOURNAL OF PHARMACEUTICAL AND BIOMEDICAL ANALYSIS | 12 | 10 |
| NUTRIENTS | 13 | 10 |
| PLANTA MEDICA | 14 | 10 |
